# Supplementary material for: Mechanochemical synthesis of non-stoichiometric copper sulfide Cu1.8S applicable as a photocatalyst and antibacterial agent and synthesis scalability verification
Source: Royal Society of Chemistry journal article supplement (doi:10.1039/d2fd00082b), 2022-05-18
Supplement: d2fd00082b1.pdf [file d2fd00082b1.pdf]

## Electronic Supplementary Information

for the paper

Mechanochemical synthesis of non-stoichiometric copper sulfide  $\text{Cu}_{1.8}\text{S}$  applicable as photocatalyst and antibacterial agent and synthesis scalability verification

Matej Baláž<sup>1</sup>, Adrian Augustyniak<sup>2,3</sup>, Batukhan Tatykayev<sup>4</sup>, Zhandos Shalabayev<sup>4</sup>, Gairat Burashev<sup>4</sup>, Erika Dutková<sup>1</sup>, Nina Daneu<sup>5</sup>, Jaroslav Briančin<sup>1</sup>, Ľudmila Balážová<sup>6</sup>, Ľudmila Tkáčiková<sup>6</sup>, Martin Stahorský<sup>1</sup>, Marcela Achimovičová<sup>1</sup>, Peter Baláž<sup>1</sup>

<sup>1</sup>Institute of Geotechnics, Slovak Academy of Sciences, Watsonova 45, 04001 Košice, Slovakia

<sup>2</sup>Chair of Building Materials and Construction Chemistry, Technische Universität Berlin, Germany, Gustav-Meyer-Allee 25, 13355 Berlin, Germany

<sup>3</sup>Faculty of Chemical Technology and Engineering, the West Pomeranian University of Technology in Szczecin, Piastów Avenue 42, 71-065 Szczecin, Poland

<sup>4</sup>Al-Farabi Kazakh National University, Al-Farabi ave., 71, 050040 Almaty, Kazakhstan

<sup>5</sup>Jožef Stefan Institute, Jamova cesta 39, 1000 Ljubljana, Slovenia

<sup>6</sup>University of Veterinary Medicine and Pharmacy, Komenského 73, 041 81 Košice, Slovakia

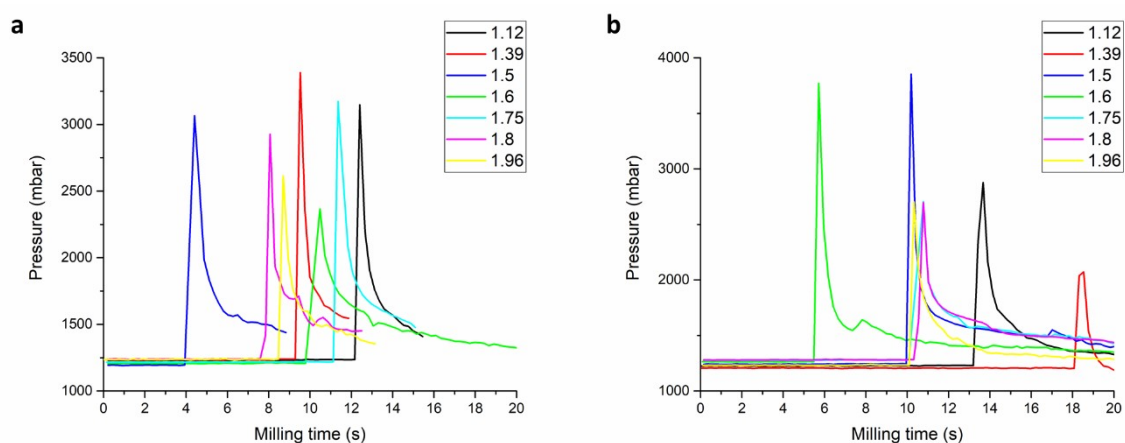

**Fig. S1: Gas pressure changes for mixtures with different Cu:S ratios until 20 seconds of milling: (a) initial experiments, (b) repeated experiments.**

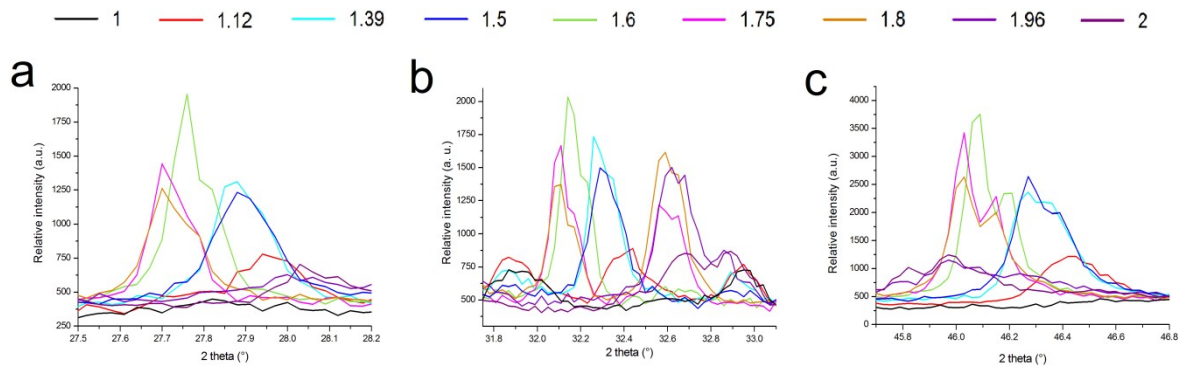

**Fig. S2: Zoomed in regions of the XRD patterns of all the reaction mixtures taken directly after the pressure event. The Cu:S stoichiometric ratios are given in figure.**

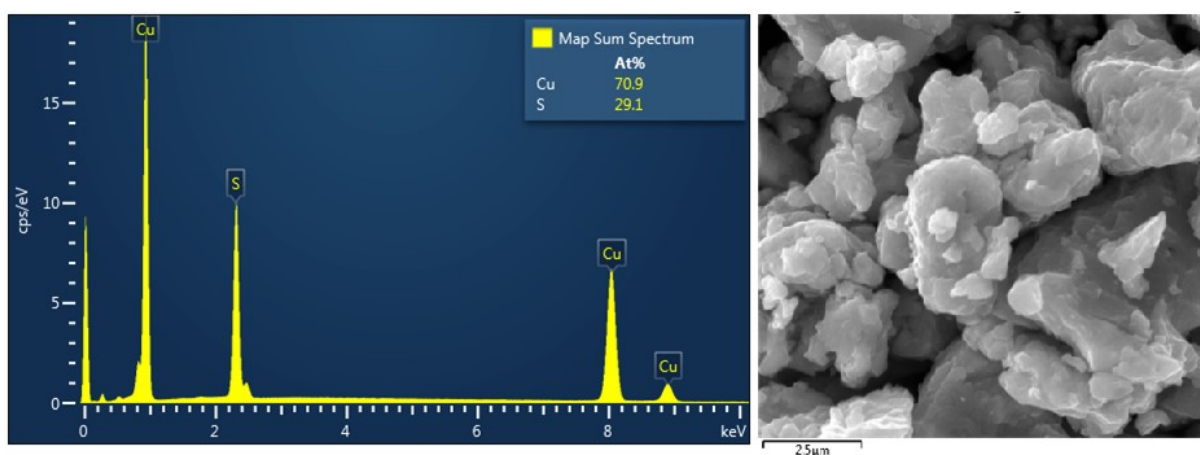

**Fig. S3: EDS analysis of digenite Cu<sub>1.8</sub>S product: the corresponding EDS spectrum (left) and the region from where the EDS spectrum was taken (right)**

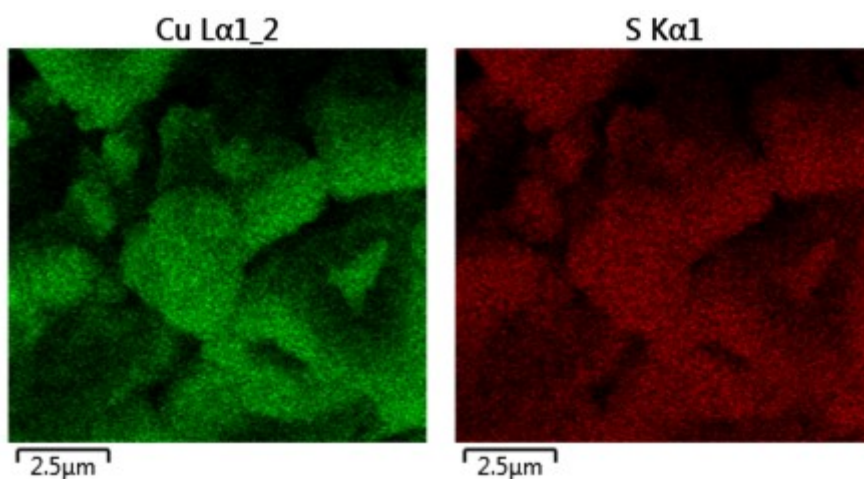

**Fig. S4: SEM-EDS elemental mapping: Cu (left), S (right)**

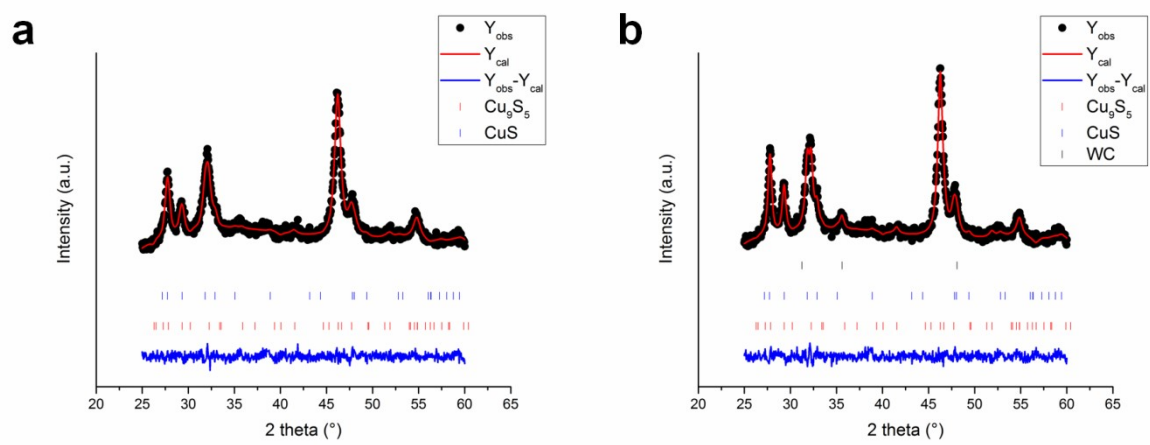

**Fig. S5:** Rietveld refinement results of XRD data of  $\text{Cu}_{1.8}\text{S}$  prepared in: (a) laboratory scale, (b) scalable fashion using eccentric vibratory milling

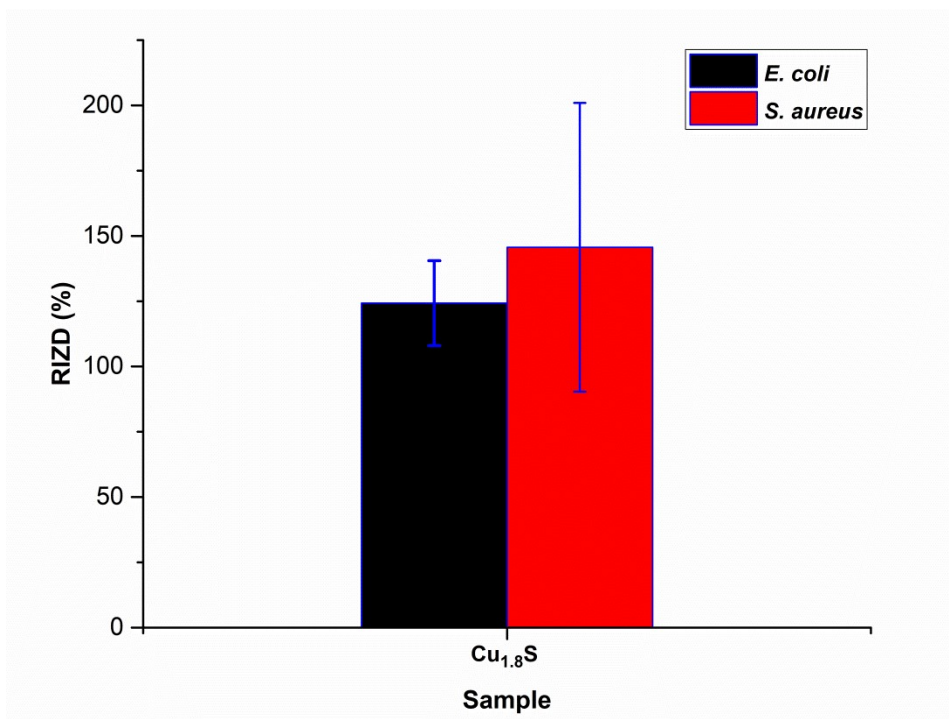

**Fig. S6:** Antibacterial activity of digenite  $\text{Cu}_{1.8}\text{S}$  nanocrystals prepared using a lab-scale setup

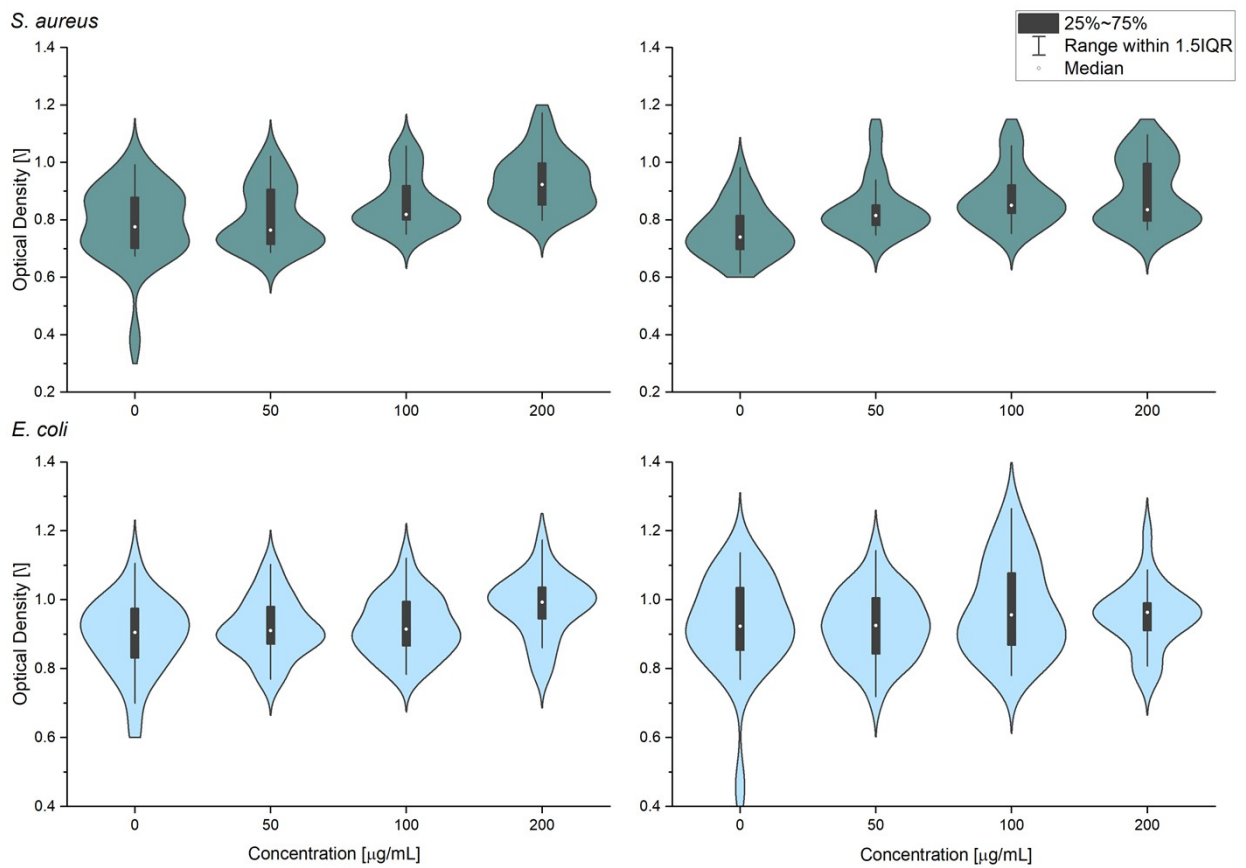

**Fig. S7: Violin plots describing optical density after 24-hour incubation of cultures treated with Cu<sub>1.8</sub>S nanoparticles . Top: *S. aureus*, bottom: *E. coli*, left: results for Cu<sub>1.8</sub>S prepared on a laboratory scale, right: results for Cu<sub>1.8</sub>S prepared in a scalable fashion**

### Optical density after 24-hours

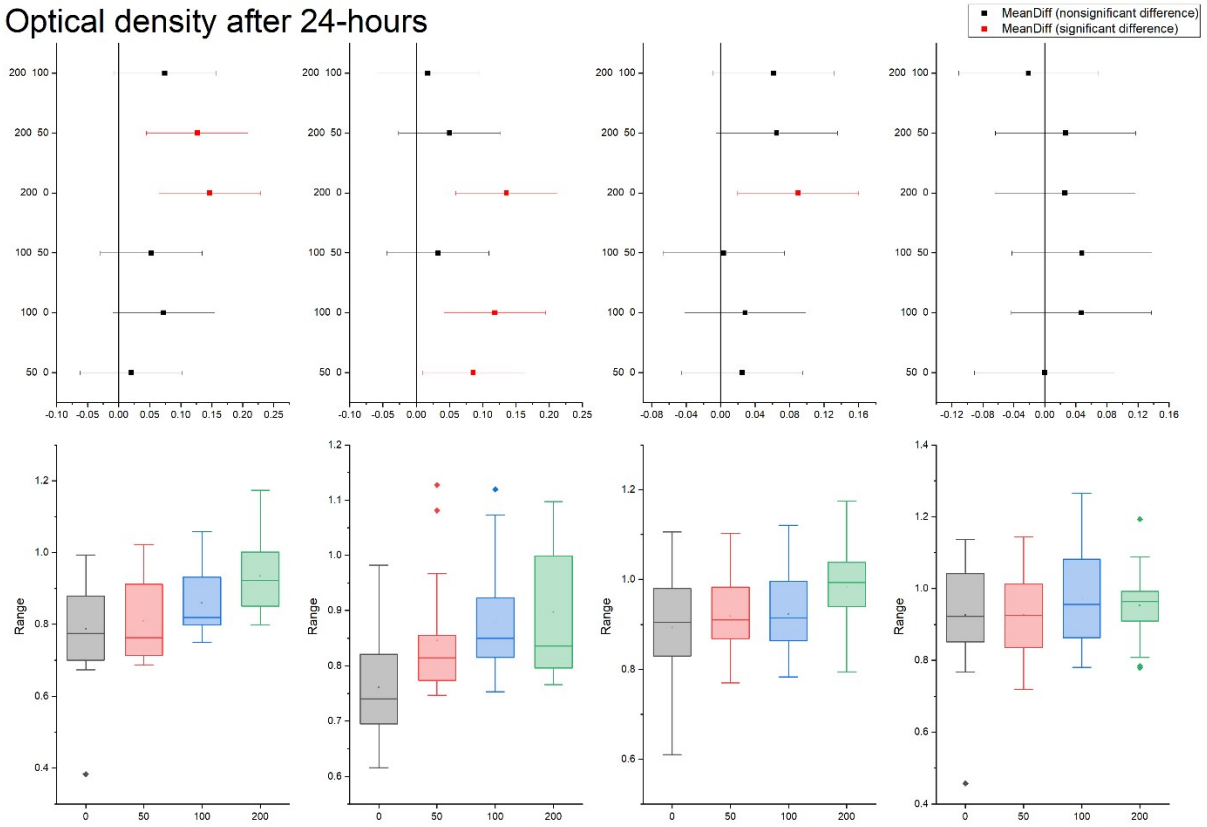

**Fig. S8: Plots describing the statistical analysis of OD of bacterial cultures co-incubated with Cu<sub>1.8</sub>S nanoparticles. The upper row represents the results of Tukey's posthoc analysis. The bottom row summarizes the obtained results on boxplots, where each plot corresponds to the plot above. Samples are presented in the following order, starting from the left: *S. aureus* Cu<sub>1.8</sub>S\_LAB, *S. aureus* Cu<sub>1.8</sub>S\_IND, *E. coli* Cu<sub>1.8</sub>S\_LAB, and *E. coli* Cu<sub>1.8</sub>S\_IND**

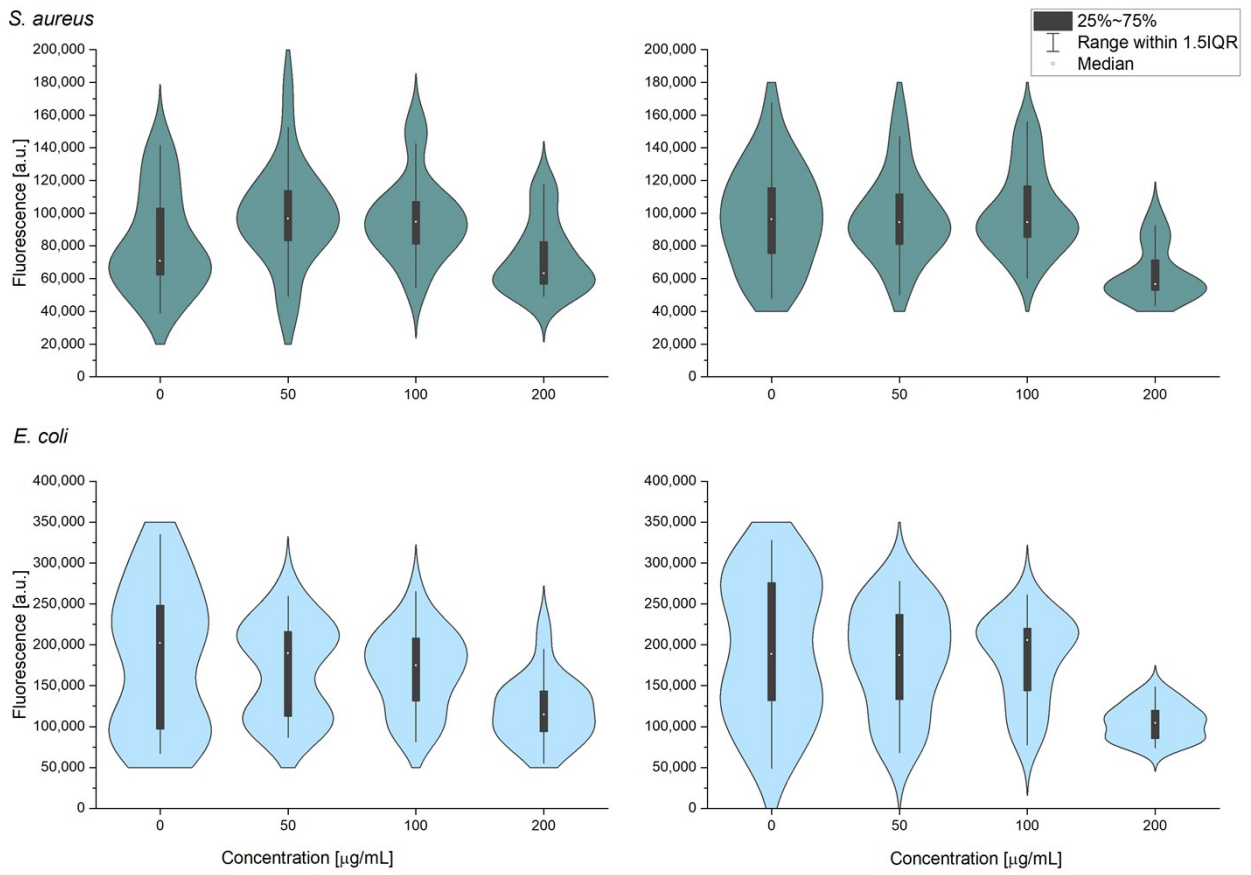

**Fig. S9: Violin plots describing respiration after 24-hour incubation of cultures treated with Cu<sub>1.8</sub>S nanoparticles . Top: *S. aureus*, bottom: *E. coli*, left: results for Cu<sub>1.8</sub>S prepared on a laboratory scale, right: results for Cu<sub>1.8</sub>S prepared in a scalable fashion**

## Respiration after 24 hours

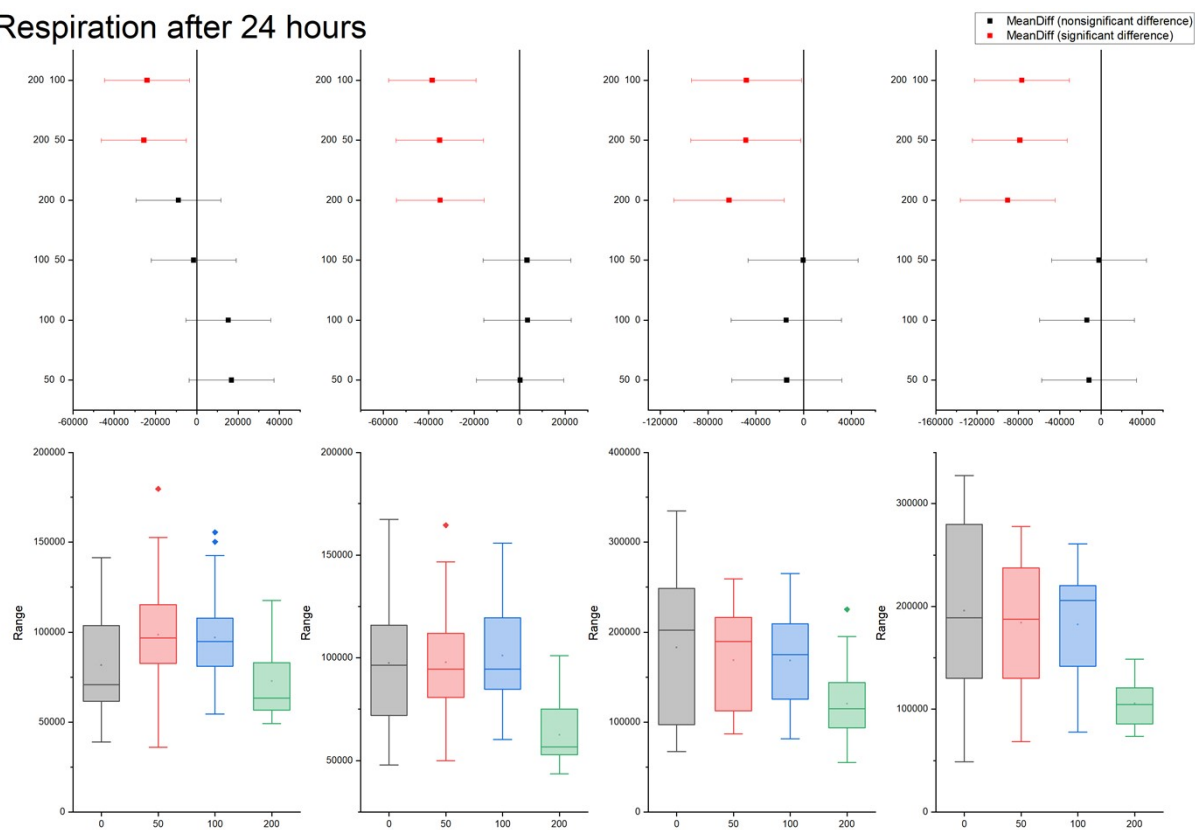

**Fig. S10: Plots describing the statistical analysis of respiration (in resazurin assay) of bacterial cultures co-incubated with  $\text{Cu}_{1.8}\text{S}$  nanoparticles. The upper row represents the results of Tukey's posthoc analysis. The bottom row summarizes the obtained results on boxplots, where each plot corresponds to the plot above. Samples are presented in the following order, starting from the left: *S. aureus*  $\text{Cu}_{1.8}\text{S}$ \_LAB, *S. aureus*  $\text{Cu}_{1.8}\text{S}$ \_IND, *E. coli*  $\text{Cu}_{1.8}\text{S}$ \_LAB, and *E. coli*  $\text{Cu}_{1.8}\text{S}$ \_IND**
